# Supplementary material
Source: PubMed Central journal article supplement (PMC5697980)
Supplement: NIHMS919681-supplement-Supporting.pdf [file NIHMS919681-supplement-Supporting.pdf]

## **Supporting Information**

# **Programmed Cell Death Protein Ligand-1 (PD-L1) Silencing with Polyethylenimine-Dermatan Sulfate Complex for Dual Inhibition of Melanoma Growth**

Gijung Kwak, Dongkyu Kim, Gi-hoon Nam, Sun Young Wang,  
In-San Kim, Sun Hwa Kim, Ick-Chan Kwon, Yoon Yeo

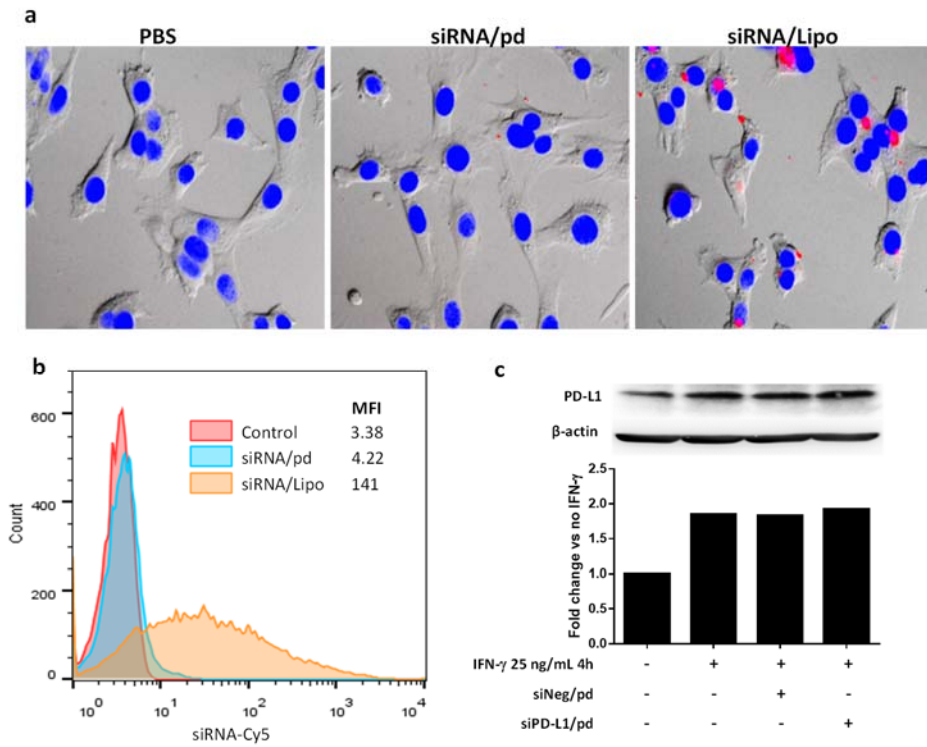

**Supporting Fig. 1.** Uptake of siRNA/pd complex by NIH 3T3 fibroblasts observed with (a) fluorescence microscopy (red: Cy 5-labeled siRNA; blue: nuclei) and (b) flow cytometry. (c) Western blotting image and quantitative representation of PD-L1 expression in IFN- $\gamma$ -activated NIH 3T3 cells treated with PBS, siNeg/pd, and siPD-L1/pd complex.

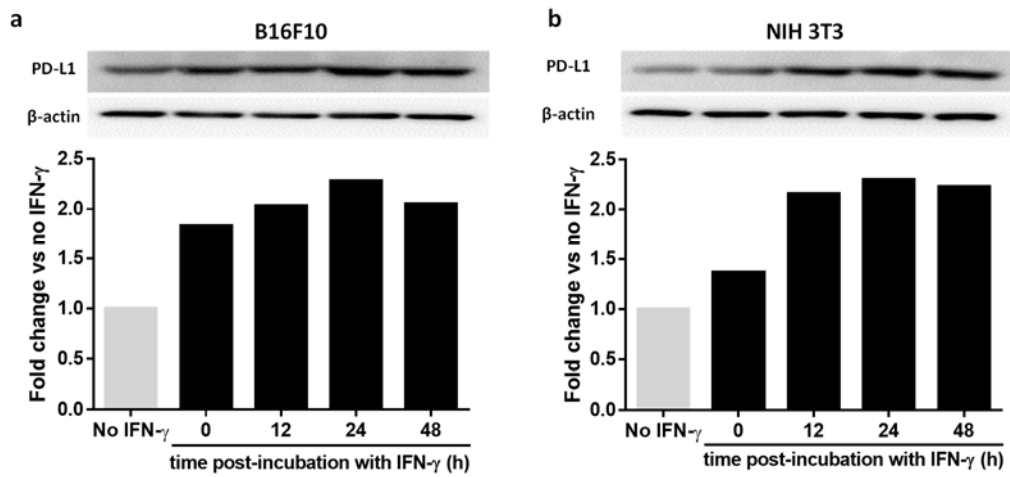

**Supporting Fig. 2.** PD-L1 expression in (a) B16F10 and (b) NIH 3T3 cells after 4 h incubation with IFN- $\gamma$  (25 ng/mL). X-axis indicates the incubation time post-incubation with IFN- $\gamma$ .

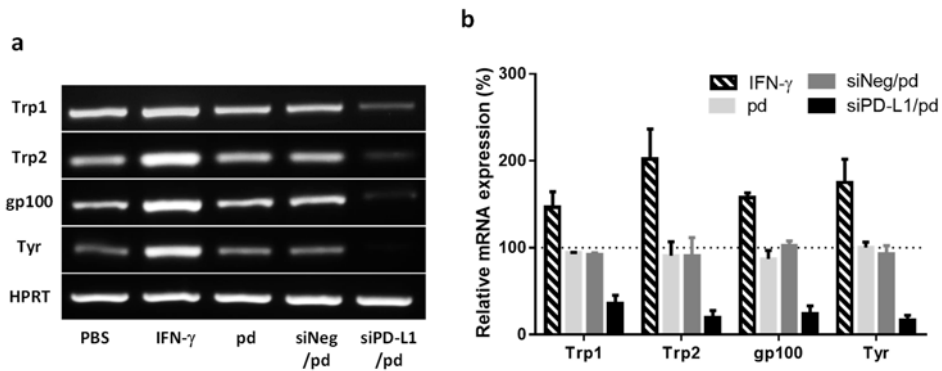

**Supporting Fig. 3.** (a) RT-PCR demonstrating melanoma specific gene expression in B16F10 cells treated with IFN- $\gamma$ , pd, siNeg/pd, and siPD-L1/pd. (b) Quantitative presentation of mRNA expression relative to PBS-treated cells. n = 3 separate experiments, mean  $\pm$  s.d. In all genes, pd vs. siNeg/pd: n.s.; all other pairs:  $p < 0.001$  by Tukey's multiple comparisons test.

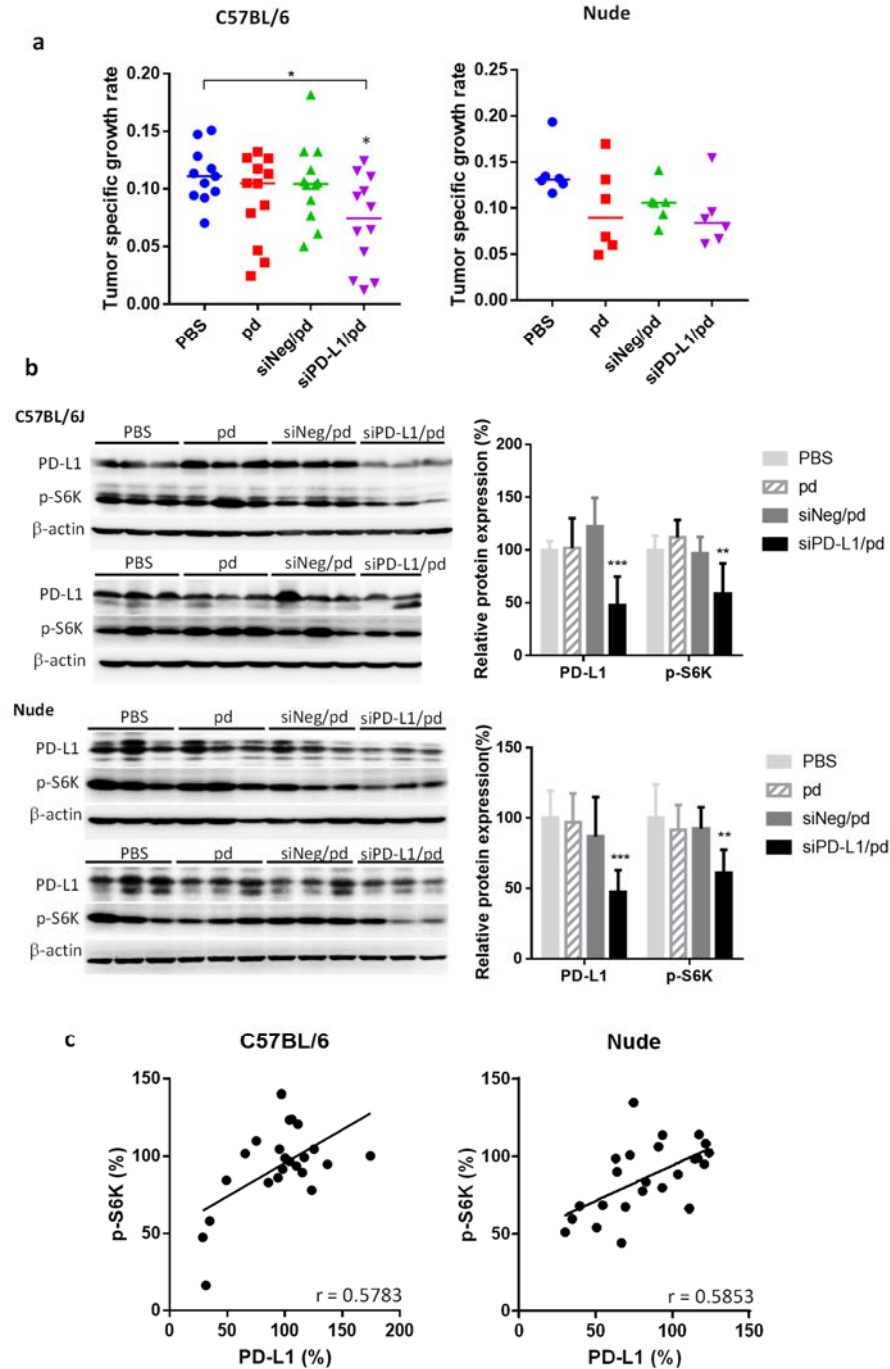

**Supporting Fig. 4.** (a) Tumor specific growth rate of B16F10 subcutaneous tumors in immune-competent C57BL/6 and immune-compromised Balb/c nude mice. 0.75 mg siRNA per kg, q5d  $\times$  3. n=11-12 mice per group for C57BL/6 mice; n = 6 mice per group for Balb/c nude mice, mean  $\pm$  s.d. \*: p < 0.05 by Tukey's test. (b) Expression of PD-L1 and p-S6K in B16F10 tumors in C57BL/6 and Balb/c nude mice. n = 5 for siPDL1/pd in C57BL/6, n = 6 for all other groups, mean  $\pm$  s.d. \*\*: p < 0.01; \*\*\*: p < 0.001 vs. PBS group by Dunnett's test. (c) Correlation between p-S6k vs. PD-L1 expression.

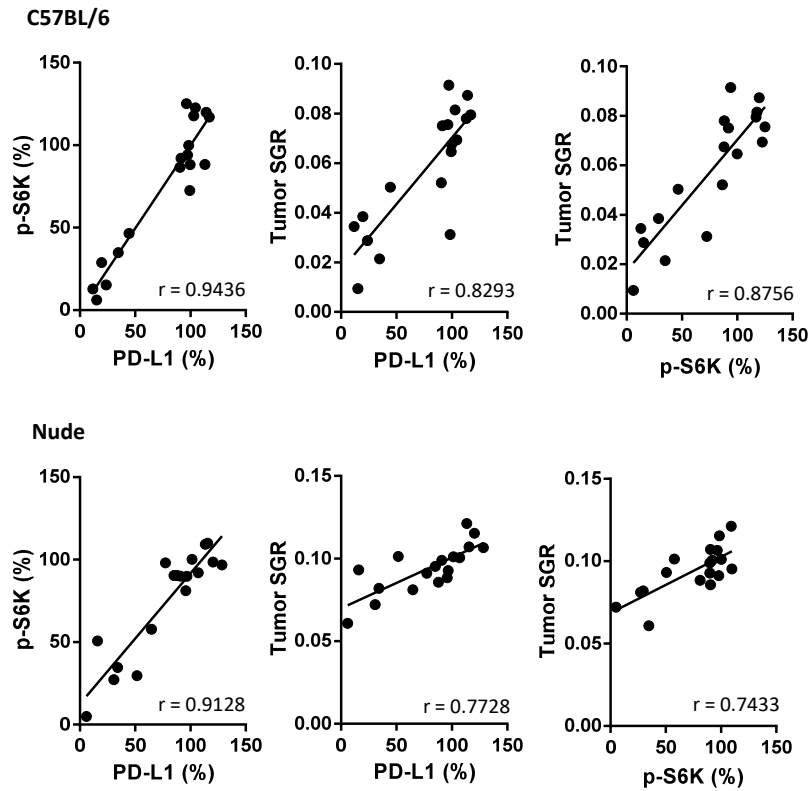

**Supporting Fig. 5.** Correlation between p-S6K vs. PD-L1 expression, Tumor SGR vs. PD-L1 expression and tumor SGR vs. p-S6K expression following 1.5 mg siRNA per kg, q3d  $\times$  5.

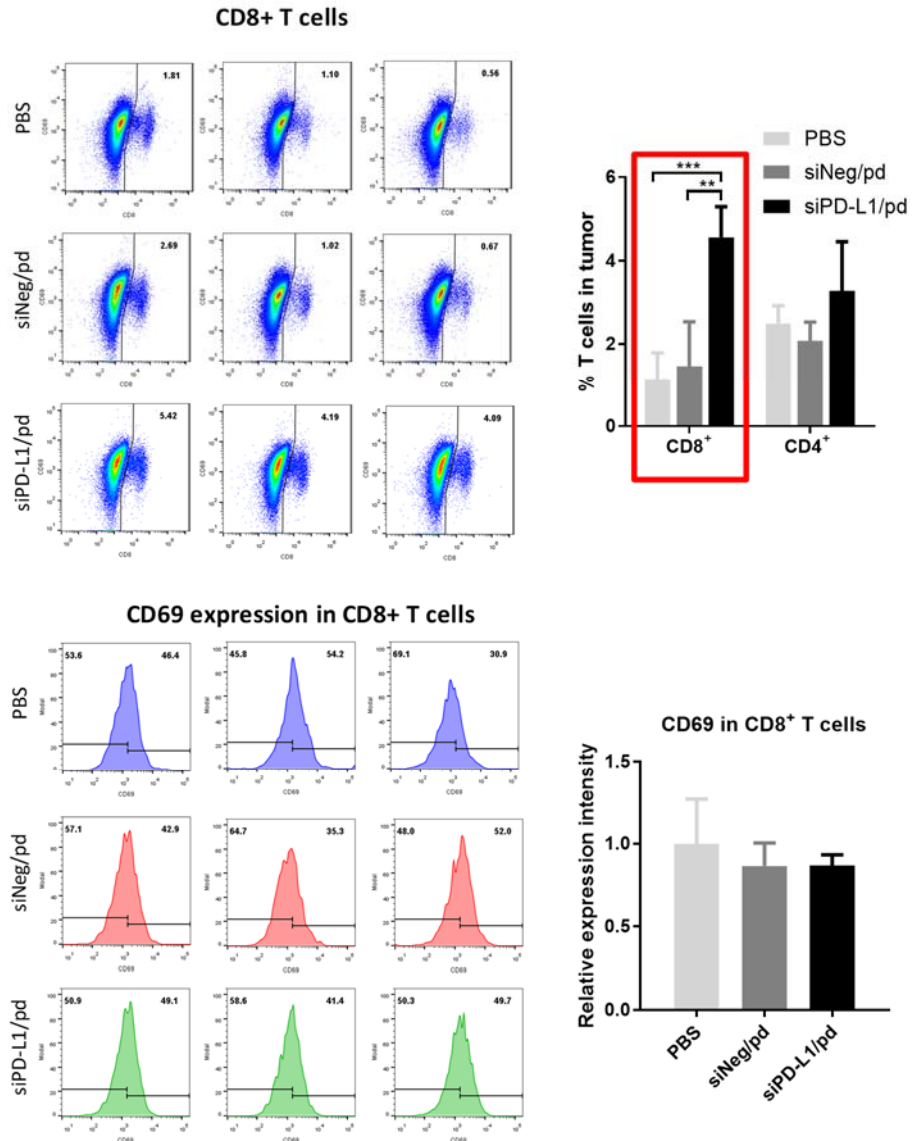

**Supporting Fig. 6.** (Top) Representative dot plots demonstrating the population of CD8<sup>+</sup> T cells in B16F10-OVA tumors of C57BL/6 mice receiving different treatments. (Bottom) Histograms demonstrating the intensity of CD69 expression on CD8<sup>+</sup> T cells. n = 3 mice per group.

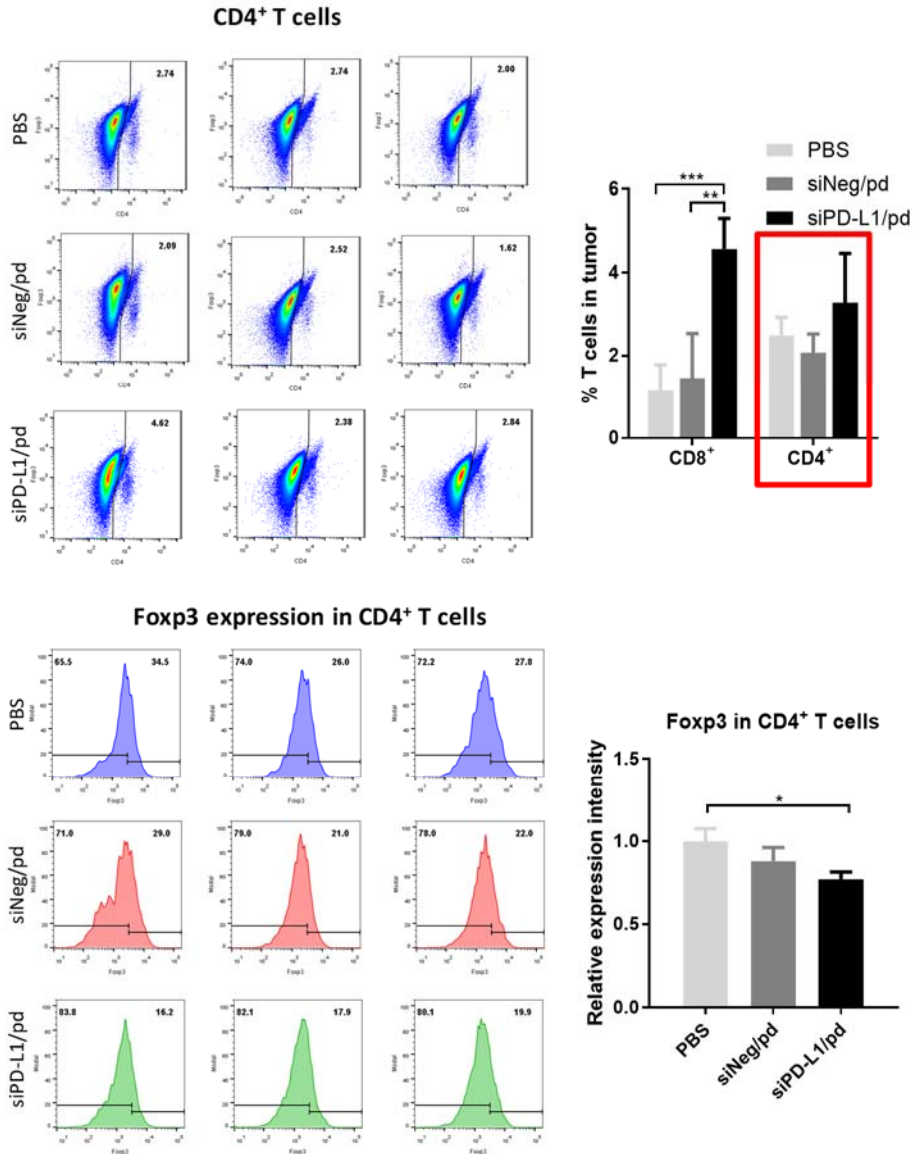

**Supporting Fig. 7.** (Top) Representative dot plots demonstrating the population of CD4<sup>+</sup> T cells in B16F10-OVA tumors of C57BL/6 mice receiving different treatments. (Bottom) Histograms demonstrating the intensity of Fcγ3 expression on CD4<sup>+</sup> T cells. n = 3 mice per group.



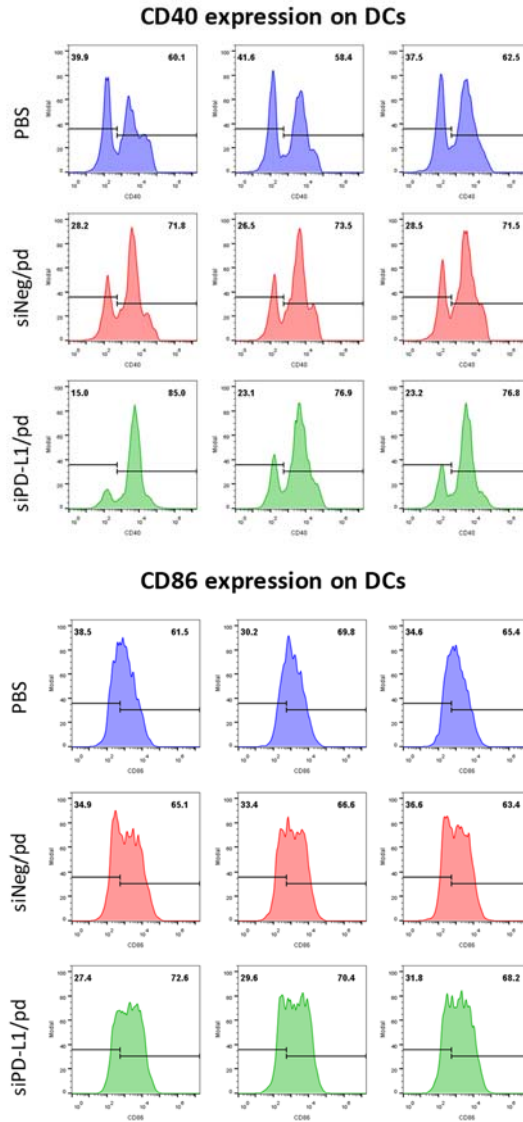

**Supporting Fig. 8.** Histograms demonstrating the intensity of CD40 (Top) and CD86 (Bottom) expression on DCs in DLNs of C57BL/6 mice with B16F10-OVA tumors receiving different treatments. n =3 mice per group.

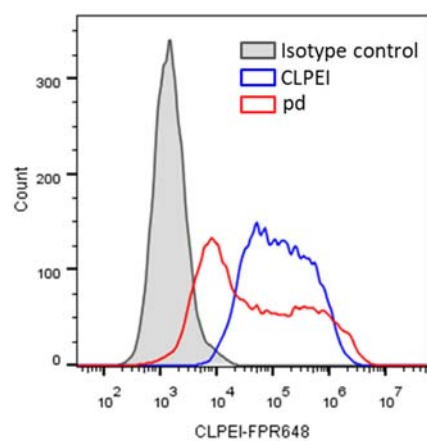

**Supporting Fig. 9.** Fluorescence intensity of CD11<sup>+</sup> BMDCs treated with FPR648-labeled CLPEI or pd complex containing FPR648-labeled for 6h. Both treatments contained 3  $\mu$ g/mL of FPR648-labeled CLPEI.
